# Supplementary material for: Effects of Sex and Western Diet on Spatial Lipidomic Profiles for the Hippocampus, Cortex, and Corpus Callosum in Mice Using MALDI MSI
Source: PubMed Central journal article supplement (PMC11544704; doi:10.1021/jasms.3c00446), 2024-03-08
Supplement: js3c00446_si_002.pdf [file js3c00446_si_002.pdf]

## Supporting Information.

# Effects of sex and western diet on spatial lipidomic profiles of the hippocampus, cortex, and corpus callosum in mice using MALDI MSI.

Catelynn C. Shafer,<sup>1</sup> Jacopo Di Lucente,<sup>2</sup> Ulises Ruiz Mendiola,<sup>2</sup> Izumi Maezawa,<sup>2</sup> Lee-Way Jin,<sup>2</sup> Elizabeth K. Neumann<sup>1\*</sup>

### Author affiliations

1. Department of Chemistry, University of California, Davis. Davis, CA, 95616
2. Department of Pathology and Laboratory Medicine, University of California Davis, Sacramento, CA95817

\*Corresponding author

Corresponding author email: [ekneumann@ucdavis.edu](mailto:ekneumann@ucdavis.edu)

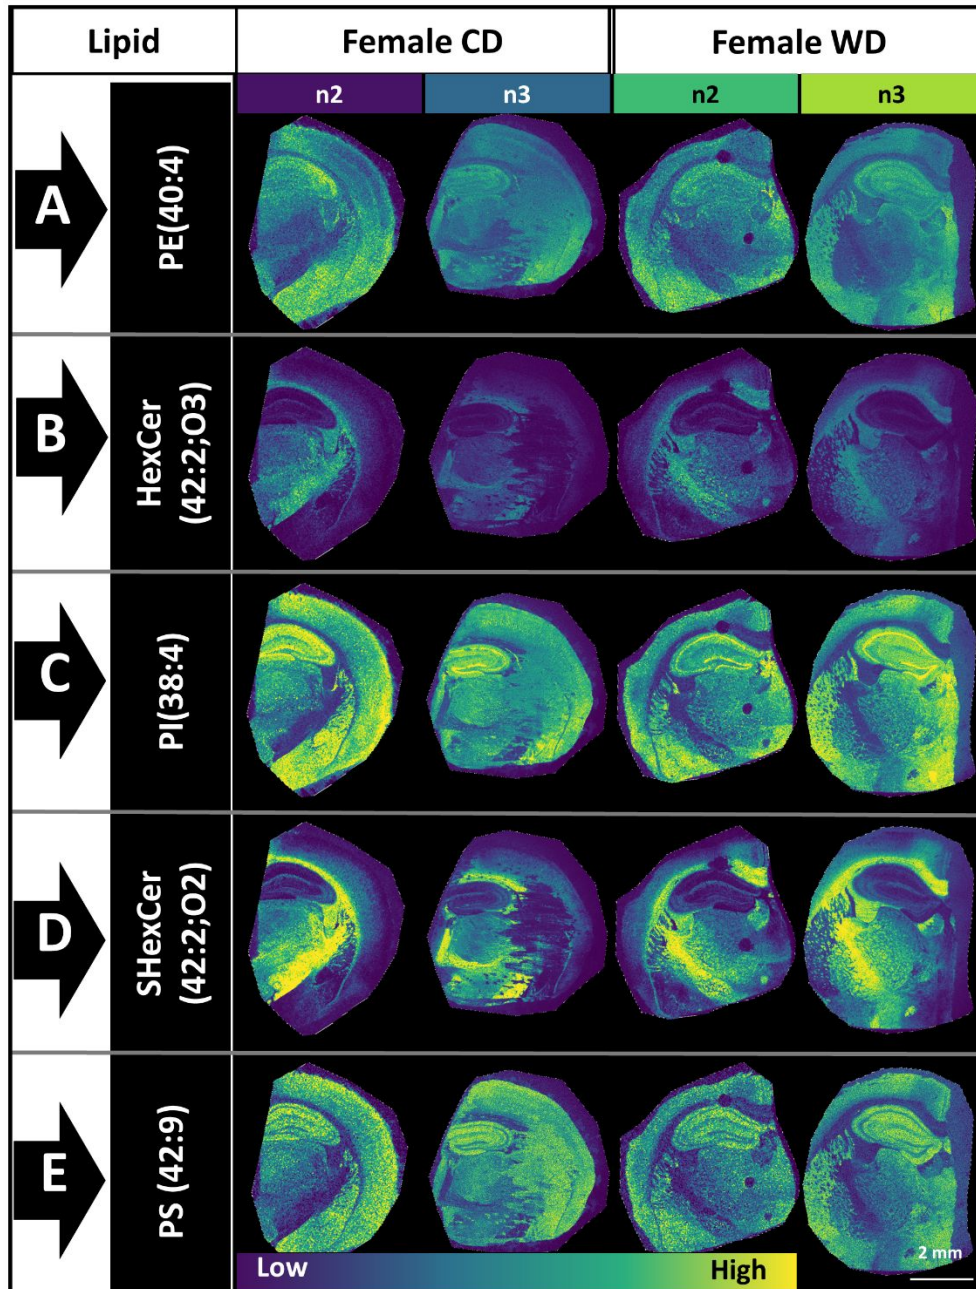

Figure S1: MALDI MS Images for A) PE(40:4) B) HexCer (42:2;O3) C) PI (38:4) D) SHexCer (42:2;O2) and E) PS (42:9) showing female replicates used in study. Note: Areas of tissue damage were excluded from regions.

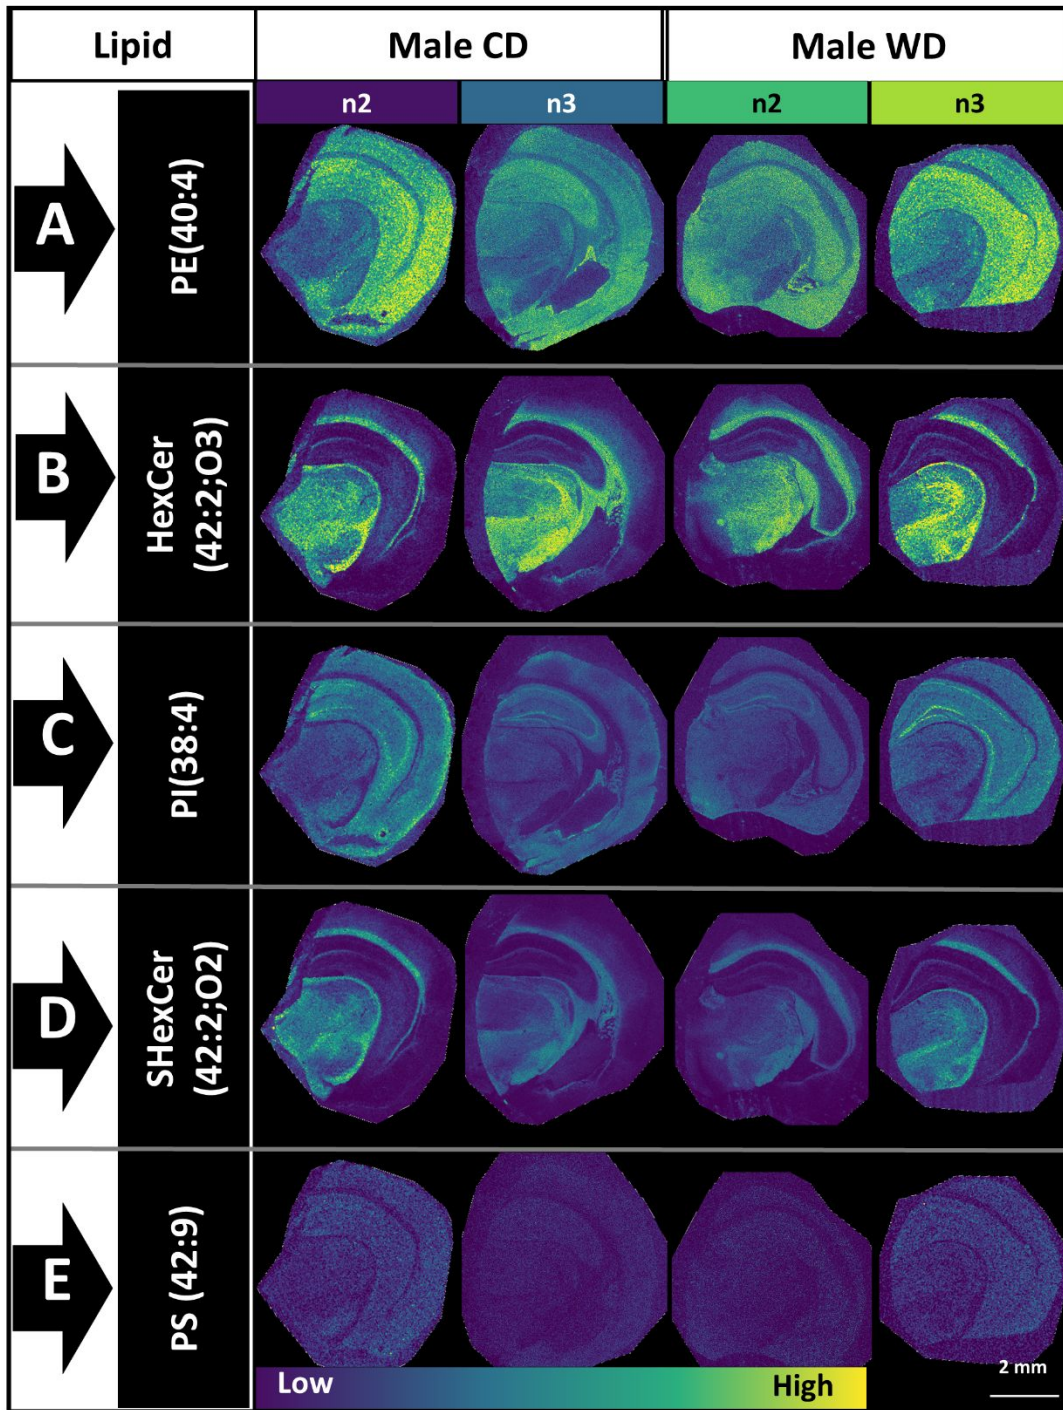

Figure S2: MALDI MS Images for A) PE(40:4) B) HexCer (42:2;O3) C) PI (38:4) D) SHexCer (42:2;O2) and E) PS (42:9) showing male replicates used in study. Note: Areas of tissue damage were excluded from regions.

Table S1 (Excell file): Detected lipid and putative identifications

Table S2 (Excell file): ROC scores for whole brain, cortex, corpus collosum, and hippocampus

Table S3 (Excell file): Statistical significance for top five whole brain ROC scores

Table S4: Method parameters for detection of lipids in negative ion mode using the matrix DAN on a Bruker MALDI timsTOF *flex*.

|                       |              |
|-----------------------|--------------|
| <b>Transfer cell</b>  |              |
| MALDI Plate Offset    | 30.0 V       |
| Deflection 1 Delta    | 110.0V       |
| Funnel 1 RF           | 400.0 Vpp    |
| isCID Enerfy          | 0.0 eV       |
| Funnel 2 RF           | 400.0 Vpp    |
| Multipole RF          | 400.0 Vpp    |
| <b>Collision Cell</b> |              |
| Collision Energy      | 5 eV         |
| Collision RF          | 500.0 Vpp    |
| <b>Quadrupole</b>     |              |
| Ion Energy            | 5.0 eV       |
| Low Mass              | 500.0 m/z    |
| <b>Focus Pre TOF</b>  |              |
| Transfer Time         | 80.0 $\mu$ s |
| Pre-Pulse Storage     | 8.0 $\mu$ s  |
